# Supplementary material for: All-solution-processed perovskite light-emitting diodes with all metal oxide transport layers
Source: Royal Society of Chemistry journal article supplement (doi:10.1039/c8cc07821a), 2018-01-01
Supplement: c8cc07821a1.pdf [file c8cc07821a1.pdf]

## Supporting Information

### **All-Solution-Processed Perovskite Light-Emitting Diodes with All Metal Oxide Transport Layers**

Lin Liu,<sup>a</sup> Zhibin Wang,<sup>a</sup> Wenda Sun,<sup>a</sup> Jin Zhang,<sup>b</sup> Shiqian Hu,<sup>c</sup> Tasawar Hayat,<sup>d</sup> Ahmed Alsaedi<sup>d</sup> and Zhan'ao Tan <sup>\*,a,b</sup>

<sup>a</sup> State Key Laboratory of Alternate Electrical Power System with Renewable Energy Sources, North China Electric Power University, Beijing 102206, China.

<sup>b</sup> Beijing Advanced Innovation Center for Soft Matter Science and Engineering, Beijing University of Chemical Technology, Beijing 100029, China.

<sup>c</sup> Key Laboratory of Optoelectronic Chemical Materials and Devices, Ministry of Education, School of Chemical and Environmental Engineering, Jiangnan University, Wuhan 430056, China

<sup>d</sup> NAAM Research Group, Faculty of Science, King Abdulaziz University, Jeddah 21589, Saudi Arabia.

Lin Liu and Zhibin Wang contributed equally to this work.

Corresponding author: [tanzhanao@mail.buct.edu.cn](mailto:tanzhanao@mail.buct.edu.cn) (Zhan'ao Tan)

## Experimental Section

### Device fabrication:

The PeLED devices are fabricated on the glass substrates with indium-doped tin oxide (ITO,  $10 \Omega \cdot \text{cm}^{-2}$ ) coated. The ITO substrates were sonicated sequentially in decon soap, distilled water, acetone, and isopropyl alcohol for 15 min each. The cleaned ITO substrates were then transferred into the UV-ozone chamber and treated for 15 min.

The preparation of nickel precursor solution, nickel formate dihydrate was dissolved in ethylene glycol, equivalents of ethylenediamine (Aldrich) was then added into the precursor prepared by fully stirring and last the completely dissolved solution with clarified purple color was filtered with  $0.45 \mu\text{m}$  nylon filters. The preparation of  $\text{NiO}_x$  electrode interlayer, the prepared solution was spin-coated on glass/ITO substrate at 4500 rpm for 90 s. Then, the substrate was annealed in atmospheric environment at  $400 \text{ }^\circ\text{C}$  for 10 min to form the  $\text{NiO}_x$  interfacial layer on glass/ITO substrate.

The  $\text{CsPbBr}_3/\text{BABr}$  thin films were spin-coated from solutions with PEO and varied  $\text{CsPbBr}_3/\text{BABr}$  (1:0.3, 1:0.5, 1:0.8) concentrations in dimethyl sulfoxide (DMSO) solvent. The precursor solution was prepared by dissolving  $\text{CsBr}/\text{PbBr}_2/\text{BABr}$  and PEO in DMSO, respectively. Before spin coating,  $\text{CsPbBr}_3/\text{BABr}$  precursor solutions were prepared by mixing  $\text{CsBr}$  and  $\text{PbBr}_2$  and  $\text{BABr}$  at different molar ratios in anhydrous DMSO to give a concentration of  $200 \text{ mg mL}^{-1}$ . PEO was dissolved in DMSO to give a concentration of  $10 \text{ mg mL}^{-1}$ . The perovskite solution and PEO solution were stirred at  $60 \text{ }^\circ\text{C}$  overnight, and premixed at 2:1 volume ratio. Perovskite thin films were prepared by spin coating the precursor solution at 4000 rpm for 35 s in a  $\text{N}_2$ -filled glovebox. After spin coating, the films were annealed at  $80 \text{ }^\circ\text{C}$  for 10 min to evaporate the solvent. The effect of varied  $\text{CsPbBr}_3/\text{BABr}$  ratios on the crystal structure and optoelectronic properties are studied.

The  $\text{ZnMgO}$  nanoparticle was dissolved in ethanol and spin-coated onto the  $\text{CsPbBr}_3$  serving as ETL. Al (100 nm) were thermally deposited sequentially under high

pressure. The active area of device is around 3.6 mm<sup>2</sup> defined by the overlapping area of ITO anode and Al cathode.

**Device characterization:**

The current–luminance–voltage measurement of the devices was carried on a computer-controlled Keithley 2400 source measure unit and Keithley 2000 Multimeter with a calibrated Si photodiode. The above measurement was carried out in a nitrogen-filled glovebox without encapsulation. EL spectra were collected by a spectrometer (Ocean Optics 2000) with an optical fiber in atmospheric environment without encapsulation and the EL emission spectrum assuming Lambertian profile.

**Steady-state photoluminescence (PL):**

PL spectra was recorded by a fluorescence spectrophotometer (Hitachi, F-4600).

**X-ray diffraction (XRD):**

The crystal structures of perovskite thin films were characterized by an X-ray diffractometer (Bruker, D8 Focus) using Cu K $\alpha$  ( $\lambda=0.15406$  nm) as the X-ray source. Diffraction patterns were measured from 5-60° 2 $\theta$  at a scanning rate of 5° min<sup>-1</sup>.

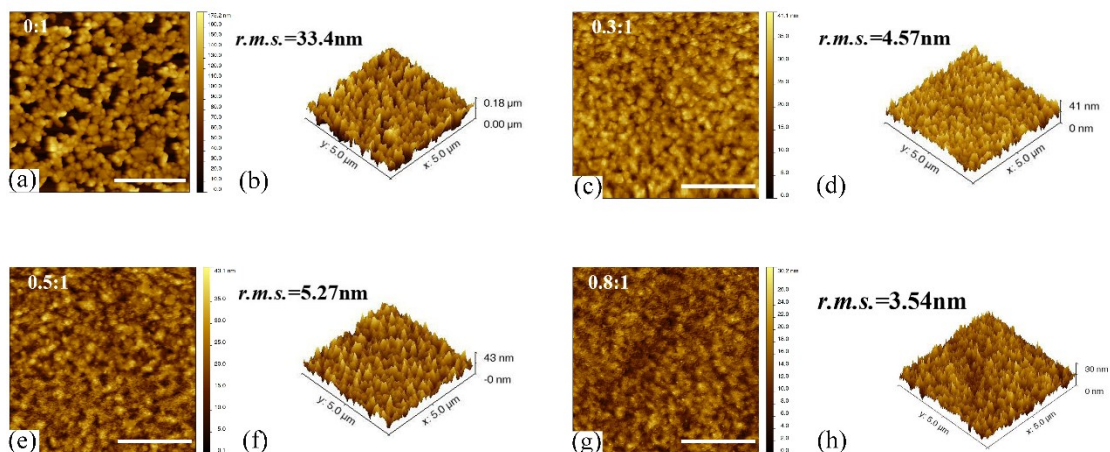

**Fig. S1** 2D and 3D AFM images of the perovskite films with different molar ratio of BABr:CsPbBr<sub>3</sub> in the precursor solution, respectively. The molar ratios are marked on the left images and roughness of the films are marked on the left sides of the 3D images, respectively. The topographic color-map is changed according to the color scale bars. All white scale bars are 2  $\mu\text{m}$ .

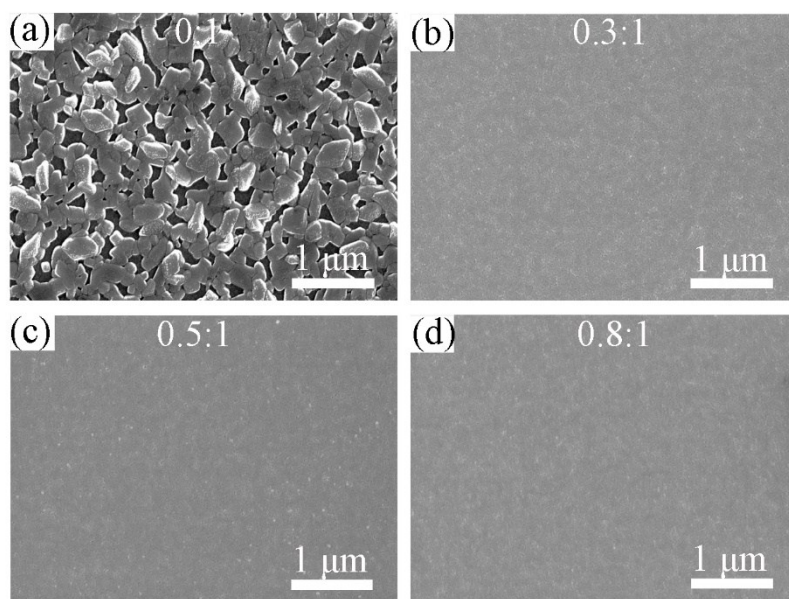

**Fig. S2** SEM images of the perovskite films with different molar ratio of BABr:CsPbBr<sub>3</sub> in the precursor solution. The molar ratios are marked on the images. All white scale bars are 1  $\mu\text{m}$ .

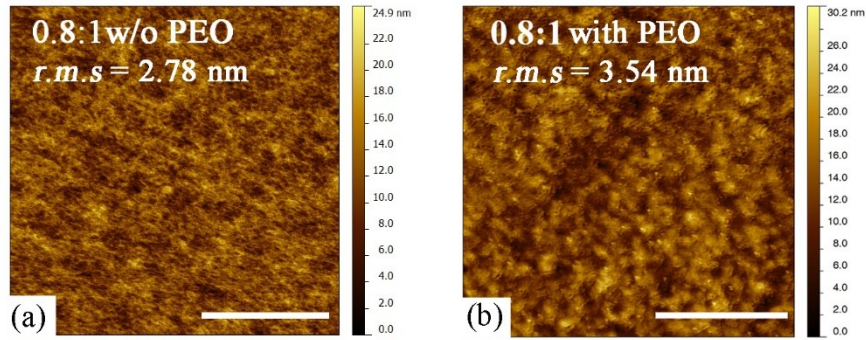

**Fig. S3** AFM images of the perovskite films without and with PEO in the precursor solution, respectively. The molar ratios and roughness of the films are marked on the images, respectively. All white scale bars are 2  $\mu\text{m}$ .

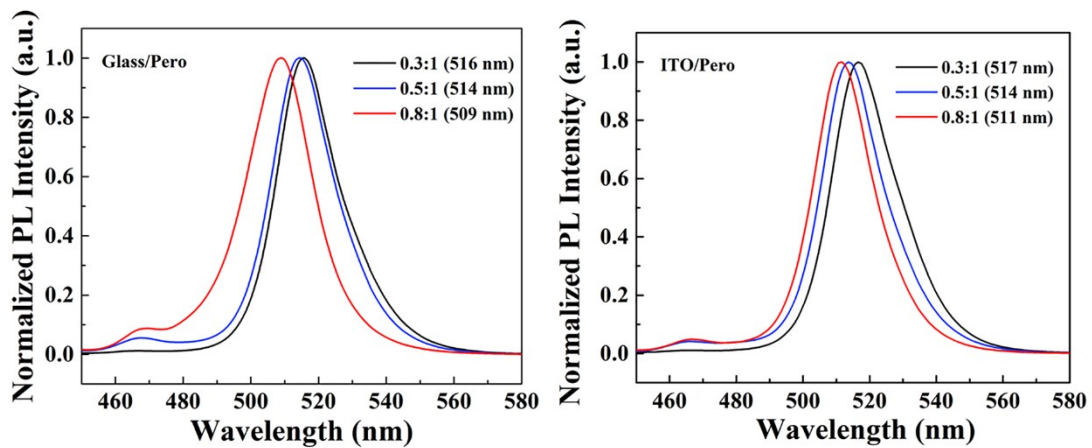

**Fig. S4** Normalized PL spectra of perovskite thin films with different  $\text{BABr}:\text{CsPbBr}_3$  molar ratios prepared on glass substrate and ITO substrate.

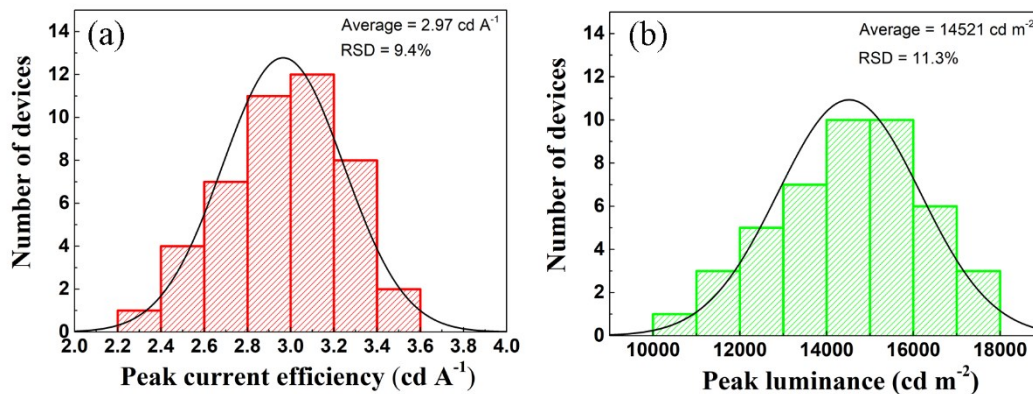

**Fig. S5** Histograms of (a) peak current efficiency (CE) and (b) peak luminance of PeLEDs measured from 45 devices ( $\text{BABr}:\text{CsPbBr}_3 = 0.8:1$ ). The average peak CE is 2.97  $\text{cd A}^{-1}$  with a low relative standard deviation (RSD) of 9.4%, and the average peak luminance is 14521  $\text{cd m}^{-2}$  with a low RSD of 11.3%.

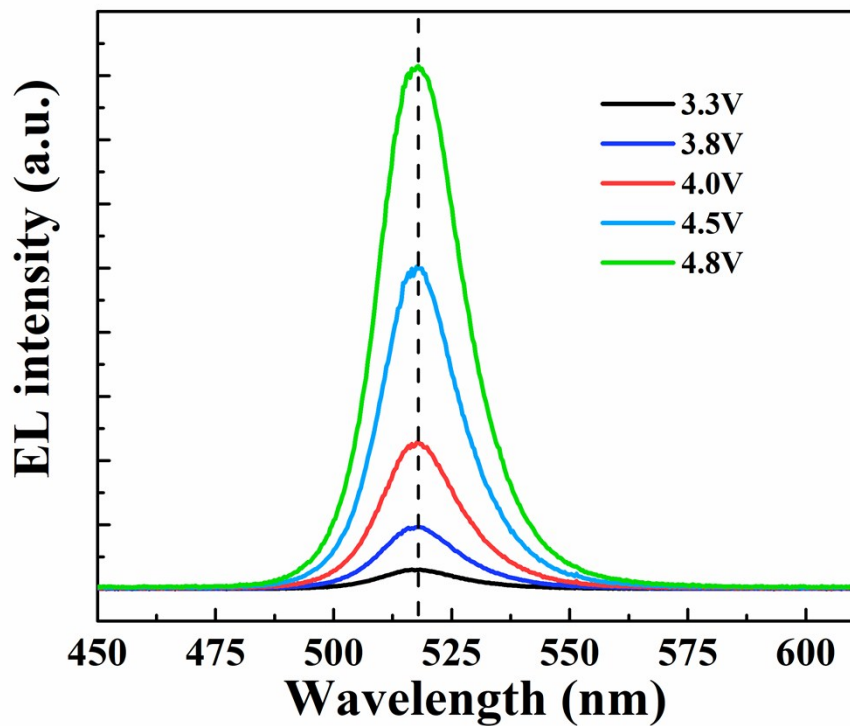

**Fig. S6** The EL spectra of PeLED devices based on  $\text{BABr}:\text{CsPbBr}_3 = 0.8:1$  driven under different applied bias.

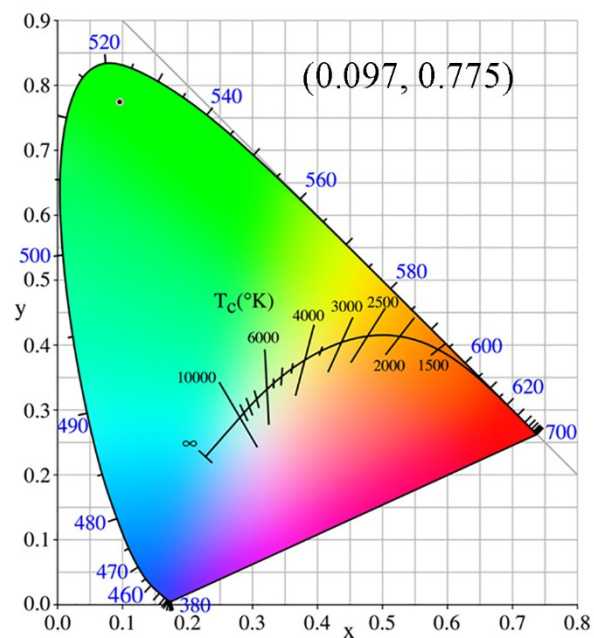

**Fig. S7** Commission Internationale de l'Eclairage (CIE) color-space coordinates of the PeLED device based on  $\text{BABr}:\text{CsPbBr}_3 = 0.8:1$ .
